# Supplementary material
Source: MDPI journal article supplement (https://www.mdpi.com/2073-4344/12/12/1521)
Supplement: s1 [file s1]

## Supplementary Materials

### Synthesis of Cobalt-Doped Iron Phosphate Crystal on Stainless Steel Mesh for Corrosion Resisted Oxygen Evolution Catalyst

Jaun An <sup>1</sup>, Hyebin Choi <sup>1</sup>, Keunyoung Lee <sup>2</sup>, and Ki-Young Kwon <sup>1,2,\*</sup>

<sup>1</sup> Department of Chemistry and RIGET, Gyeongsang National University, Jinju 52828, Republic of Korea; alxkdi1@gnu.ac.kr (J.A.); gpqls3214@gnu.ac.kr (H.C.)

<sup>2</sup> HAP materials, 352-407, 501, Jinju-daero, Jinju 52828, Republic of Korea; kyounglee96@gmail.com (K.L.)

\* Correspondence: kykwon@gnu.ac.kr (K.-Y.K.)  
Tel.: +82-55-772-1493 (K.-Y.K.)

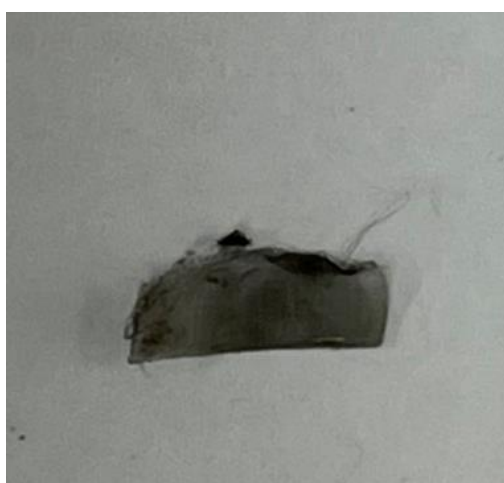

**Figure S1.** Picture of SSM that corroded away after the hydrothermal reaction in 4.14 wt %  $\text{H}_3\text{PO}_4$  solution, except for the part inserted into a homemade Teflon holder.

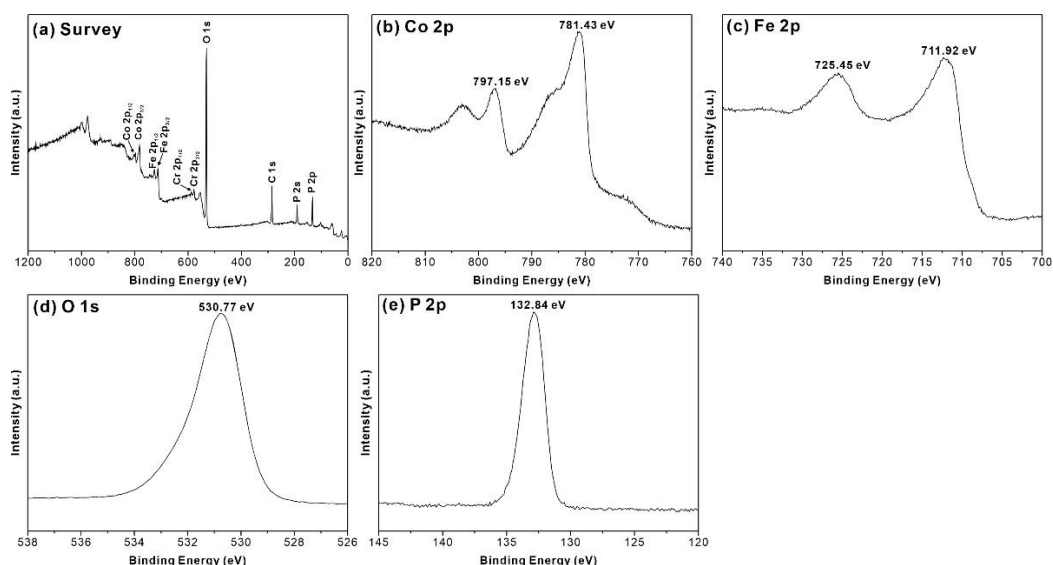

**Figure S2.** (a) XPS survey spectrum for iron phosphate oxide hydroxide crystal. (b-f) XPS spectra of iron phosphate oxide hydroxide crystal in the (b) Co 2p, (c) Fe 2p, (d) O 1s, and (e) P 2p.

**Table S1.** Comparison of OER activity of 0.84-CoFePi with recently reported Co and Fe based catalysts.

| Catalysts                                        | substrate                        | Electrolyte | Overpotential (mV)<br>@ 10 mAcm <sup>-2</sup> | Reference |
|--------------------------------------------------|----------------------------------|-------------|-----------------------------------------------|-----------|
| 0.84-CoFePi                                      | Stainless steel mesh             | 1 M KOH     | 300.3                                         | This work |
| Amorphous $\alpha$ -phase<br>NiCo hydroxide      | Stainless steel foil (planar)    | 1 M KOH     | 257                                           | [1]       |
| Amorphous $\alpha$ -phase<br>Ni(OH) <sub>2</sub> |                                  |             | 273                                           |           |
| Amorphous $\alpha$ -phase<br>Co(OH) <sub>2</sub> |                                  |             | 305                                           |           |
| Co <sub>x</sub> O <sub>y</sub> /NC               | Nitrogen-doped carbon            | 0.1 M KOH   | 430                                           | [2]       |
| PE-Co <sub>3</sub> O <sub>4</sub> NS/Ti          | Ti foil                          | 0.1 M KOH   | 300                                           | [3]       |
| Fe adsorbed CoO <sub>x</sub>                     | Glassy-carbon-disk               | 1 M KOH     | 309                                           | [4]       |
| Mn-Co LDH/Graphene                               | Graphene                         | 1 M KOH     | 330                                           | [5]       |
| CoFeP@C                                          | N, P dual-doped carbon<br>matrix | 1 M KOH     | 336                                           | [6]       |
| CoNi-CoO@NC/CP                                   | Carbon paper                     | 0.1 M KOH   | 392                                           | [7]       |

- Balram, A.; Zhang, H.; Santhanagopalan, S. Enhanced Oxygen Evolution Reaction Electrocatalysis via Electrodeposited Amorphous  $\alpha$ -Phase Nickel-Cobalt Hydroxide Nanodendrite Forests. *ACS Appl. Mater. Interfaces* **2017**, *9*, 28355-28365.
- Masa, J.; Xia, W.; Sinev, I.; Zhao, A.; Sun, Z.; Grützke, S.; Weide, P.; Muhler, M.; Schuhmann, W. Mn<sub>x</sub>O<sub>y</sub>/NC and Co<sub>x</sub>O<sub>y</sub>/NC Nanoparticles Embedded in a Nitrogen-Doped Carbon Matrix for High-Performance Bifunctional Oxygen Electrodes. *Angew. Chem. Int. Ed.* **2014**, *53*, 8508-8512.
- Xu, L.; Jiang, Q.; Xiao, Z.; Li, X.; Huo, J.; Wang, S.; Dai, L. Plasma-Engraved Co<sub>3</sub>O<sub>4</sub> Nanosheets with Oxygen Vacancies and High Surface Area for the Oxygen Evolution Reaction. *Angew. Chem. Int. Ed.* **2016**, *55*, 5277-5281.
- Gong, L.; Chng, X.Y.E.; Du, Y.; Xi, S.; Yeo, B.S. Enhanced Catalysis of the Electrochemical Oxygen Evolution Reaction by Iron(III) Ions Adsorbed on Amorphous Cobalt Oxide. *ACS Catal.* **2018**, *8*, 807-814.
- Bao, J.; Xie, J.; Lei, F.; Wang, Z.; Liu, W.; Xu, L.; Guan, M.; Zhao, Y.; Li, H. Two-Dimensional Mn-Co LDH/Graphene Composite towards High-Performance Water Splitting. *Catalysts* **2018**, *8*, 350.
- Gao, L.; Chang, S.; Zhang, Z. High-Quality CoFeP Nanocrystal/N, P Dual-Doped Carbon Composite as a Novel Bifunctional Electrocatalyst for Rechargeable Zn-Air Battery. *ACS Appl. Mater. Interfaces* **2021**, *13*, 22282-22291.
- Ao, K.; Daoud, W.A. Facile controlled formation of CoNi alloy and CoO embedded in N-doped carbon as advanced electrocatalysts for oxygen evolution and zinc-air battery. *Electrochim. Acta* **2021**, *395*, 139204.
